# Supplementary material
Source: Research Square preprint supplement (doi:10.21203/rs.3.rs-9303463/v1)
Supplement: Supplementary file 1 [file ebfc51054ff8d44c78476449.docx]

**FOCUS GROUP DISCUSSION (FGD) TRANSCRIPT GROUPED**

**SECTION A: INTRODUCTION**

**Can you introduce yourself and share your role as a caregiver/ mother in your household?**

AMAC 1: I am a civil servant, and I am the caregiver of my home. I have three children. Thank you.

AMAC 2: I am a wife, mother, and caregiver in my home. I have four children. Thank you.

AMAC 3: I am the caregiver of my home, and I have three children as well.

AMAC 4: I have two children.

AMAC 5: I have one child. Thank you.

KWL 1: My name is [identifier removed], i am a mother of 5 children, i am a hosewife and he caregiver of my household.

KWL 2: I am a mother of three children, and I am the caregiver of my home. I take care of my children. I am a housewife as well.

KWL 3: I am also the caregiver of my home. I have five children, three under five children, and I run a provision shop.

KWL 4: I am the caregiver of my household. I have one child under five, and I work as a baker.

KWL 5: I also am the caregiver of my home, and I have two children under five.

GGW 1: I am [identifier removed]. A mother of children both old and young.

GGW 2: my name is [identifier removed]. I am a mother of 3 children. I take care of my children whenever they have health issue (I take them to the hospital).

GGW 3: my name is [identifier removed]. I am a mother in the house, I have children and I also take care of them.

BWR 2: I’m by name [identifier removed]. Im a mother in my household.

BWR 4: my name is [identifier removed]. I am a mother of 2 children and I am very concerned about my children’s health.

BWR 1: my name is [identifier removed], a caregiver in my household. As a caregiver I try as much as I can to show love, concern and assistance.

KUJ 4: my name is [identifier removed]. Im a mother

KUJ 5: my name is [identifier removed]. Im a mother

KUJ 2: my name is [identifier removed]. I am a mother of 2 kids.

KUJ 3: I am [identifier removed]and I am a mother of 3.

KUJ 1: my name is [identifier removed]. My role as a mother is an adviser, schooler, spiritualist, friend, politician, everything.

ABJ 2: im a mother of 4 children. As a housewife I cook, take care of the children

ABJ 4: I am a mother of one child. I do the house chores, take care of the children and ensure they are in good health.

ABJ 5: I am the mother of 2 children. I take care of the children, bathe them, take them to school, feed them.

**Have you ever heard about the Seasonal Malaria Chemoprevention (SMC) program? If yes, what do you know about it?**

AMAC 1: I’m aware of it. My child took it, but one of them had a terrible reaction. She had a fever for two days, and when her father saw it, he warned me not to give her the medication again. He was very upset.

AMAC 2: Oh yes, I am very much aware. I’ve been giving it to my children since it started over two years now. My two children have been taking the SMC medication for malaria.

AMAC 3: Oh yes, I’m aware. Maybe whenever Participant 5 is not around, that’s when they come. I always thought she knew because even when I’m not around, sometimes they give it to my eldest daughter to give her siblings or keep it for me. So I thought she was aware. I’m so sorry. But I have been taking it now for two years.

AMAC 4: I am aware of the program, but I also stopped because of the side effects. I heard about it from a friend who said they came to her house. She gave her child the drug, so I did too.

AMAC 5: I’ve never heard about it. I told you when you called that I have not heard about it. I’ve been living here for over a year now, and I’ve never seen people come around to distribute any medication. But my neighbor said they have, so I don’t know.

KWL 1: Yes i have it is a preventive malaria drug given to children under the age of 5 and i have been giving my children for two years now.

KWL 5: What I understand by SMC is it is used to prevent malaria in under-five children.

KWL 2: I think I do.

KWL 3: I also agree

KWL 4: I also agree.

GGW 1: Ive heard about it through those going around sharing it.

GGW 2: Yes I have heard about the SMC program. I hear about it from the health workers. What I know about it is that it prevents malaria. Because when I used it on my children it prevents malaria.

GGW 3: yes I know about it because they use to come house to house.

BWR 2: Ive heard about it and I know it a drug that are given to children to prevent malaria.

BWR 4: I have heard about it before. I have seen health workers entering house by house in this Bwari. So when they reached my house I asked them what it is and they said its for malaria. I was happy when I heard its for malaria. At least malaria would not be a problem again. And when I gave my children the drug worked. I thought it wouldn’t work before. So I was surprised. It worked.

BWR 1: yes I have. I got to know about it from health workers and it has been effective.

KUJ 4: malaria prevention drugs

KUJ 5: yes. They bring malaria prevention medicine for us

KUJ 2: yes. Its okay.

KUJ 3: Its malaria prevention injection that is being given to children of 5 years or thereabout.

KUJ 1: ive heard about it but ive not really sat down to be educated deeply about it.

ABJ 3: yes. it prevents malaria

ABJ 6: ive heard about it. Most times those healthcare people do pass and tell us about it. They advise us to give our children so that the malaria will not have any effect on them.

**SECTION B: KNOWLEDGE AND AWARENESS OF SMC**

**How did you first learn about the SMC program?**

AMAC 2: I first heard about it from the people distributing the drugs. They came over and introduced the drug, explaining what it was about. They said they were from the health facility, and I know they do a lot of immunizations there, so I allowed my children to take the drug.

AMAC 3: I heard about it from healthcare workers at the facility when I was there, and I’ve been giving my children the drugs since then.

AMAC 4: I heard about it from a friend who said they came to her house. She gave her child the drug, so I did too.

AMAC 5: I have never seen them. I have never heard about it, so I have nothing to say.

KWL 1: from the healthcare worker at the primary health care

KWL 3: Well, I first learnt about the SMC program from one of my family friends. She lives in the opposite street, and she told me that some people came to her house and gave her malaria drugs, and it is very effective in preventing malaria in children, and she has taken it for a year plus. She told me that I should take it also, that they used to give it year by year, so I should give my children also when they come. So that was why I started.

KWL 2: Oh, I first heard about the SMC program from the healthcare center. I went there to treat malaria for my child, and they told me about the drug that is used to prevent malaria during the rainy season, that they will be coming from household to household when it starts, that I should make sure I give my children, and I have been giving my children.

GGW 1: I learned about it from people going to the community and sharing them to us.

GGW 2: I learned about it from health workers moving around.

GGW 3: I know about it through health workers

BWR 2: through the health workers, those giving immunization. They came one day knocking at my door.

BWR 4: from one of my neighbours in my community and the health workers

BWR 1: apart from the fact that we hear several announcements and jingles in the television, in the school where I teach, health workers came around and presented it to us.

KUJ 4: community outreach

KUJ 5: I heard it from health workers publicizing the drugs in the community.

KUJ 2: I heard it from the TV and from health workers going from house to house. Its okay.

KUJ 3: when we went for immunization someone introduced me to it in a PHC.

KUJ 1: I came across it in the internet and I just browsed through it

ABJ 2: through the health workers

ABJ 3: through the health workers

ABJ 5: the healthcare workers always pass with microphone announcing it. And sometimes we also hear it during the Friday mosque.

**What do you know about the purpose of the SMC program?**

KWL 1: to prevent malaria in children

GGW 1: according to them the purpose was to prevent malaria.

GGW 2: the purpose according to the health workers is for the prevention of malaria. And actually it prevents malaria. When you take the drugs it will prevent the child from malria for a period of 1 month

GGW 3: prevent malaria in the country. The prevention is for children under 5.

BWR 2: it’s a tablet give to children from 0 to 5 given to prevent early malaria from occuring.

BWR 4: I heard that it is to prevent malaria fever. Malaria is a very dangerous illness that can kill. I don’t take it lightly.

BWR 1: its all about prevention.

KUJ 4: malaria prevention

KUJ 5: to prevent malaria in children

KUJ 2: prevent malaria

KUJ 3: its for malaria prevention

KUJ 1: I think its malaria prevention from mother and child care, ante-natal care

ABJ 2: to prevent malaria

ABJ 3:to prevent malaria

ABJ 4: it helps in the prevention of malaria in children. Obviously it is very useful

**SECTION C: PERCEPTIONS AND ATTITUDES**

**What is your opinion about the SMC program and its effectiveness in preventing malaria?**

AMAC 2: Yes, it has been very effective. My visits to the hospital due to malaria have reduced. If my child eats well and takes the medication, she doesn’t fall sick during that period.

AMAC 3: Same here. My child has not had malaria apart from minor side effects like mild fever and skin rashes. But even with those, they faded after a day, so I continued the medication.

AMAC 1: Honestly, my child got malaria two months after taking the medication, which made me doubt its effectiveness. But from what I’m learning today, maybe it actually worked. If they come again this year, I might give my child the drug.

AMAC 5: I have never been aware of it, so I don’t think I can say anything about its effectiveness.

AMAC 4: I wouldn’t say it worked or didn’t work because I only gave my child the drug twice. But for those two months, she didn’t have malaria.

KWL 1: it is very effective in preventing malaria in children under 5, and my children had not had malaria while taking the medication, other than the side effects. Like fever, my son had a serious fever the first time he took it but subsequently his body got used to it and no more fever again

GGW 1: my opinion is that if the program can be continued regularly so that malaria can be controlled to certain level.

GGW 2: yes it is very very effective. When I gave it to my child I discovered in that moth there was no symptom of malaria. And for the period I gave the drug there was no symtpon of malaria. So I believe it is very very effective.

GGW 3: for them to make it a continuous program and also give awareness to the public.

BWR 2: the program is effective and they shoud continue. It is very effective

BWR 4: the drug is good. They should produce more. They should also produce for adults since adults too have malaria. The drug is like first aid. It is very effective.

BWR 1: its good. It should be encouraged further. The awareness should go farther than where it has been so that more people will be aware and embrace it. My children have used it, I have used it, the grown up ones have used it. Its effective. Its good.

KUJ 4: its very effective

KUJ 5: I enjoy the medicine. When I give My children during the rainy season they don’t get sick.

KUJ 2: yes its okay. It prevents. It nice. When you use it you will be okay.

KUJ 3: well, its very effective speaking from experience. I think it does prevent the malaria well.

KUJ 1: the program is very good to prevent malaria for mother and child.

ABJ 2: yes its working

ABJ 5: it is very effective in preventing malaria in my children.

**Do you trust the medications provided through the program? Why or why not?**

KWL 1: Yes i do

KWL 4: I actually trust the medication. I believe it is effective in treating malaria, yes

KWL 3: I trust the medication as well.

KWL 2: I also trust the medication

KWL 5: Yes, I do. But sometimes, because of the side effects, it can really discourage someone to give their children the medication. Like the last time my child took the medication, my child was having rashes. But we were able to buy one cream like that, that we rubbed on the child, and that was how my baby started feeling much better.

GGW 1: after using the program we found that the drugs are very effective.

GGW 2: yes I trust the medication because I saw the effectiveness.

GGW 3: of course yes I trust because we learned about it through the health workers and they give us little knowledge about it.

BWR 2: initially I was doubting it but when I administered it to my children I now discovered that it’s a good drug.

BWR 4: I trust it because it is very effective. One can observe the effectiveness in a child 30 minutes after administration.

BWR 1: I trust the medication because it has gone very far in helping my family to prevent the unforeseen. If not for it we would have spent beyond what is expected and the child too would have been exposed to more pain beyond expectation.

KUJ 4: im not sure about it because there’s one of my sons given the drugs. He was sick. His eyes was having issues.

KUJ 5: yes I trust it because they tell us that they are bringing the drugs from the hospitals.

KUJ 2: I trust it very well. In fact it is okay. If I use it for my children, O God, they will be okay, sleep well, be healthy, look fine and eat well. In fact if the urinate I could observe the effectiveness of the drugs.

KUJ 3: yes I do. I think 98%

KUJ 1: yes we should trust the medication provided through the program because at least it has to go through certain standards agreed in our country and I don’t think any country will introduce anything harmful to its citizens.

ABJ 2: yes I trust it. The medication is very effective but sometimes it affects the children through the rashes the use to come out of their bodies. Sometimes their eyeballs will be red. Sometimes the children’s body will look somehow

ABJ 3: yes

ABJ 6: I trust it but not 100% because it is a medicine and it doesn’t cure malaria 100%.

**How do you feel about administering the medications at home?**

KWL 1: i have no problem with it as it is easier than going to the primary health care center to collect the drug.

KWL 3: I actually don’t have a problem with giving the medication at home. For me, I even like it because going to that healthcare center sometimes, you know, there will be a line and all those things, so it is better they come to our house and give it to us, in my opinion.

KWL 2: Yes, I agree with her.

KWL 4: I also agree

KWL 5: I also agree.

GGW 1: I feel it better at home because it doesn’t cost me much transportation cost since its been brought to my door post.

GGW 2: its very easy to give based on the way it was written on the card. It is very easy to administer.

GGW 3: to me its okay but if I will go by advising them its better to do it in the health centers because coming home will make other people think otherwise because some coming home are not health workers and that will discourage some of our people

BWR 2: I feel alright because its even less stress going to the pharmacy, buying drugs, taking them to the hospital. When you have the drugs and you notice malaria you just give them. I feel good.

BWR 4: it is good because it is easier than taking a child to the hospital. It is like a first aid. It is easy. It is not hard because the health workers will give instruction on how to use it.

BWR 1: I feel okay. Its just a matter of following the instructions on the one you are supposed to give Day 1, Day 2 and Day 3. simple

KUJ 4: easy to administer

KUJ 5: its nothing because this is not the first time the government bring drugs for us to offer our children.

KUJ 2: I don’t have any issues with it. Ive been using it from when I had my first child until now.

KUJ 3: its quite okay. Its easier because even the stress of going to the hospital is another thing to think about

KUJ 1: me basically I don’t like administering anything at home. But with guidance I think it is okay.

ABJ 2: it makes the work easy for mother because the health workers follow you to your house, you will not stress yourself to the facility

ABJ 6: sometimes I used to be scared because I wouldn’t know if the medicine is already expired or not. Most times we do take the risk to give our children and we found out that there is no side effects at all.

**SECTION D: FACTORS INFLUENCING UPTAKE**

**What are the main reasons you enrolled (or did not enroll) your child in the SMC program?**

AMAC 2: Because of its effectiveness. People I know, including from my church, also said their children didn’t have malaria while on the program.

AMAC 3: The results I saw made me want to continue.

KWL 1: Because my neighbor gave her child, and she it has been effective

GGW 1: I enrolled them because my children were partakers of the drugs and it was effective on them.

GGW 2: the reason is because malaria is rampant everywhere now. So I see this drug as a golden opportunity. I tested it and I saw the results

GGW 3: I enrolled all my children.

BWR 2: I enrolled them because I liked it. It saved me stress from running to the hospital or labs when they are sick.

BWR 4: malaria is everywhere and this season is malaria time. The rainy season makes mosquitoes to multiply. There are also stagnant waters in the community. This is the season of mosquitoes.

BWR 1: I didn’t go deep into it to know that there is need for one to get registered. I just felt that its just for us to get the drugs and then administer it to our children.

KUJ 4: because I believe it might help to prevent

KUJ 5: they told me that the drugs prevent malaria and malaria affects children

KUJ 2: I asked questions before using it. I was told that it was malaria drugs and my children will be okay when I give them.

KUJ 3: because of the effectiveness

KUJ 1: malaria is rampant

ABJ 2: because the medicine is effective and it prevents malaria

ABJ 6: for the prevention of malaria. Mosquitoes are everywhere now

**What factors make it easier or harder for you to participate in the program?**

GGW 1: because we used the product and it was very effective

GGW 2: there is no factor that made it harder. Rather it was easier for me because the health workers took their time to explain the drugs- how it works, how to administer it and its effectiveness.

GGW 3: I find it easier because they come house to house

BWR 2: sometimes the drugs are not really available when I need it. Or sometimes they will not come to my area to distribute the drugs. Sometimes I wont know where to get the drugs.

BWR 4: I do not need to pay anything or go anywhere. It is brought to my house. No need to make transportation anywhere.

BWR 1: its just the fact that I wasn’t aware.

KUJ 5: its easy. Im okay with it.

KUJ 2: nothing is hard about it. Everything is okay.

KUJ 3: none

KUJ 1: if it is very accessible then every mother can participate freely. But if it is far away from our reach it will be hard to access since the current situation of Nigeria make it difficult for people to move around.

ABJ 2: the health workers follow us to our house

ABJ 3: the health workers follow us to our house

ABJ 4:some nurses take the drugs house by house making it easy for us.

ABJ 6: sometimes the health care workers come very early in the morning when you have gone to work.

ABJ 5: some of the health workers go to the schools making it easier.

**SECTION E: BARRIERS AND CHALLENGES**

**What challenges have you experienced with accessing or participating in the SMC program?**

AMAC 1: For me, my child’s side effects and my husband’s reaction made me stop giving it. He thought the drug was a scam. But now I know it was just a side effect, and I’ve learned that you can get free medication at the health center for that.

AMAC 5: If I had known about the drug, I would have allowed my child to take it.

AMAC 3: I don’t have any issues. The process is easy—take it for three days, and that’s it.

KWL 1: Well, wherever i am not home, and the people distributing the drugs come to my compound, they would skill my house for that month, i would have to go to the PHC to collect it for that home which is a bit difficult for me as my house is a but far from the PHC

KWL 4: For me, honestly, like participant 4 had said, because of the side effects. Honestly, I remember when my child first took the medication, my child actually was having fever down for two days. But the person that gave me the drug had already told me that there will be side effects and I should not panic. So I did not really panic. It was the third day that I went to the primary healthcare center, which I was told anyway, to go to the primary healthcare center if the side effect is becoming too much. But on the third day when I went there, they gave my child medication and since then my child has been well.

KWL 2: our children had not had any side effects.

GGW 1: there’s no any problem. It never affected me.

GGW 2: one of the challenge is that when the child is already having malaria and you give the child the medication, it will bring it out. The malaria will come up. But when the child is not having malaria in the body it prevents malaria for that period.

GGW 3: I never faced any challenges

BWR 2: sometimes the availability. You will need it you don’t know who to ask you don’t know where to get it from.

BWR 4: there is no challenge. It is very easy. Everyone can do it.

BWR 1: I havent experienced challenge. When I am in need of it I get them from the health workers.

KUJ 4: no

KUJ 5: the first time I start administering the drugs to my child, his body became hot and weak but I was advised by the health workers to administer ORS to my child and he was well.

KUJ 2: there’s no challenge about it.

KUJ 3: no any challenge

KUJ 1: I havent participated in the program but if I have opportunity I will do it

ABJ 2: the children will be looking dull sometimes.

ABJ 3: the challenge is rashes and sometimes you see the children eyes will be red, some hotness of the body. No challenges from the workers.

ABJ 4: honestly since the program started we havent experienced any challenges. However, we are not certain about the possibility of future challenges.

**How do cultural or religious beliefs in your community influence participation in the program?**

GGW 1: there was no any negative reaction from the community. It was accepted.

GGW 2: my religion belief does not condemn taking it.

GGW 3: there is nothing that has to do with religion

BWR 2: some might say don’t take it. Some will question whether it is working. Some may say don’t give your girl child, they’re trying to reduce the fertility of the girl child bit for me I don’t believe those superstitions.

BWR 4: my religion is not against it. My religion wants health and the wellbeing of my children.

BWR 1: so parents come to the head of the school to inform us that we should not allow their children to participate.

KUJ 4: no

KUJ 5: no

KUJ 2: no. no cultural barrier. My neighbours like it too.

KUJ 3: no

KUJ 1: the community I live some are not educated, some believe that maybe it might not support child birth.

ABJ 2: nothing like religious or cultural barrier

ABJ 3: they believe it 100%

ABJ 6: most times they announce it in church

**SECTION F: RECOMMENDATIONS**

**What suggestions do you have for improving the implementation of the SMC program?**

AMAC 2: Not really, but they should communicate their schedule. Sometimes you miss them, and then you have to go to the health facility, which can be stressful for some people.

AMAC 3: I agree. If they tell us when they are coming, we can make arrangements.

AMAC 1: They need to create more awareness, especially about side effects. If people understand them, they will know what to do and not panic. My husband didn’t trust the drug because of our child’s reaction, so I stopped giving it.

AMAC 5: I never even knew about the drug. They should use media platforms to promote it more. More awareness is needed.

KWL 1: yes they should have a timely month period for the drug distribution so that we will know that this particular date of the month is for the medication and can be available at home to collect it or leave someone at home to help us collect it.

KWL 2: For me, honestly, I don’t have any suggestions. But I would say there should be more awareness on this thing. Because honestly, if not because some of us, you know, in our neighborhood we are close and we kind of see what’s happening. Because sometimes you might not even be around at home and this thing will pass you and you will not be aware. Or maybe they will not even come to your house and all those type of things. So maybe they should create awareness and make sure everybody, they carry everybody along. Because you cannot give this compound and you will not give the next compound. I think that is not fair.

KWL 3: Just like participant 1 has said, I think more awareness. I think a lot of people are not aware of the drug. So I think we should, a lot of people, more awareness for me.

KWL 4: Honestly, for me, the side effects. If they can be given something to take for side effects in case of anything like that. But like I said, I went to the healthcare facility. But apart from that, I don’t have any issue.

KWL 5: Honestly, for me, I would say maybe more awareness as well. A lot of people are not aware and it’s very, very beneficial. And I would like to say kudos to the people organizing this program. They should continue and I hope they will continue because it has really, really helped us in this community. Our children have stopped having malaria like before. Like it has drastically reduced.

GGW 1: the suggestion I have for them is never to give up but continue giving the drugs out to prevent malaria in our community.

GGW 2: we suggest that they should have SMC for adults also since malaria does not only affect children. This way it will go round the family.

GGW 3: they should create awareness in people and educate them more.

BWR 2: they should try and make the drugs available. They should try to reach out too.many don’t even know about it. They should create more awareness especially in Bwari.

BWR 4: there should be SMC for adults too. Not just for children. They should produce for adults too. Also, there should be provision of mosquito nets.

BWR 1: I suggest that in spite of the awareness in the media, selected health workers should go to the communities to create more awareness like in immunization of deadly childhood diseases like polio, measles. In community meetings, churches and mosques.

KUJ 4: I don’t have any idea

KUJ 5: they should include the mosquito nets with the drugs so that we can prevent mosquito bites.

KUJ 2: no

KUJ 3: no

KUJ 1: it should be well accessible and people should be well informed about it through education of the people.

ABJ 3: I will say they should keep it up.

ABJ 4: They should come at the appropriate time when we will be at home. They should also give us the drugs sufficiently. Sometimes children don’t want to take drugs. They can be coming along with biscuit or sweet to entice children into taking it as done in regular children immunization programs.

ABJ 6: while they visit homes in the morning they should also visit in the evenings so that those of use who do not have the opportunity to collect in the morning will collect in the evening.

**What additional measures do you think could help reduce malaria cases among children under five in your community?**

GGW 1: they should add more nets and give us insecticides that we can be using in our environment.

GGW 2: there should be provision of mosquito nets alongside the SMC because of the kind of environment we are living.

GGW 3: we have the malaria nets.

BWR 2: I think let the drugs be available, they should try and get mosquito nets because some people cannot even afford nets. Its unfortunate they say nets are free but its not free. Some homes and families cannot afford the nets. If possible they should manufacture SMC for adults too and not just for children.

BWR 4: people should stop keeping stagnant waters. Parents should ensure their homes and environment is clean.

BWR 1: absolute cleanliness and hygiene. Families in rural centers should be taught hygiene. Keeping the environment neat and eating good food. Not necessarily expensive food but balanced diet. Food should be prepared in a clean environment with clean utensils. Cooks should be clean too. Especially during this rainy season.

KUJ 4:they should try and be giving mosquito nets

KUJ 5: provision of mosquito nets is my only suggestion

KUJ 2: what we need is mosquito nets to prevent mosquito.

KUJ 3: I think eradication of mosquitoes and also provision of mosquito nets

KUJ 1: firstly is environmental health. We should teach our mothers to keep the environment clean, burning bushes, gutters and cleaning of the house. Especially those in rural areas, do not expose children below five years in the night.

ABJ 2: by sleeping in the mosquito nets.

ABJ 3: by using insecticides

ABJ 6: let the healthcare people give us mosquito nets and not just the drugs to cure the malaria

ABJ 5: they should be consistent in supplying the drugs monthly.
